# Supplementary material for: The Impact of the COVID-19 Emergency on Life Activities and Delivery of Healthcare Services in the Elderly Population
Source: MDPI journal article supplement (doi:10.3390/jcm10184089), 2021-09-10
Supplement: s1 [file s1]

Table S3: Responses to the questions if wearing mask and/or gloves is a great difficulty in elderly patients and socio-demographic and clinical factors [in red =  $p < 0.005 \rightarrow$  significant correlation]

| Feature (variable)                                                                              | p value     |
|-------------------------------------------------------------------------------------------------|-------------|
| Gender                                                                                          | $p = 0.645$ |
| Age                                                                                             | $p = 0.351$ |
| Place of residence                                                                              | $p = 0.101$ |
| Household size                                                                                  | $p = 0.515$ |
| Education                                                                                       | $p = 0.534$ |
| Household income per person per month                                                           | $p = 0.125$ |
| Coronary Heart Disease                                                                          | $p = 0.466$ |
| Diabetes Mellitus                                                                               | $p = 0.468$ |
| Asthma                                                                                          | $p < 0.001$ |
| COPD                                                                                            | $p = 0.008$ |
| Heart failure                                                                                   | $p < 0.001$ |
| Kidney failure                                                                                  | $p = 0.796$ |
| Was vaccinated against influenza in 2019                                                        | $p = 0.161$ |
| Was vaccinated against influenza in 2020                                                        | $p = 0.816$ |
| Avoids vaccination because of possible complications                                            | $p < 0.001$ |
| Wants to be vaccinated against influenza but was unable due to lack of availability of vaccines | $p = 0.013$ |
| The GP doctor recommended vaccination against influenza and pneumococci                         | $p = 0.108$ |
| Knows about refund for seniors vaccinated against influenza and pneumococci                     | $p = 0.290$ |
| Number of drugs taken                                                                           | $p = 0.058$ |
| Cardiac drugs                                                                                   | $p = 0.042$ |
| Antihypertensive drugs                                                                          | $p = 0.067$ |
| Diuretics                                                                                       | $p = 0.927$ |
| Analgesics                                                                                      | $p = 0.019$ |
| Digestive ailments drugs                                                                        | $p = 0.294$ |
| Anticoagulants                                                                                  | $p = 0.582$ |
| Antidepressants                                                                                 | $p = 0.057$ |
| Nootropics                                                                                      | $p = 0.262$ |
| All drugs are prescribed by the same doctor                                                     | $p = 0.040$ |
| The number of different doctors that have prescribed medications?                               | $p = 0.429$ |
| Informs the GP about all new medications                                                        | $p = 0.314$ |
| Buys drugs and/or supplements without a prescription                                            | $p = 0.387$ |
| Analgesics                                                                                      | $p = 0.544$ |
| For heartburn                                                                                   | $p = 0.821$ |
| Herbal                                                                                          | $p = 0.092$ |
| Vitamins (C, B, D)                                                                              | $p = 0.368$ |
| Other                                                                                           | $p = 0.992$ |
| Physician diagnosed gastro-oesophageal reflux disease                                           | $p = 0.185$ |
| Activities of Daily Living (ADL)                                                                | $p = 0.563$ |
| The Lawton Instrumental Activities of Daily Living (IADL)                                       | $p = 0.011$ |
| Abbreviated Mental Test Score (AMTS)                                                            | $p = 0.228$ |
| Geriatric depression scale (GDS-15)                                                             | $p < 0.001$ |

|                                          |                                         |
|------------------------------------------|-----------------------------------------|
| Gastric Anxiety Scale (GAS-10)           | <i><b><math>p &lt; 0.001</math></b></i> |
| Lubben Social Network Scale (LSNS-6)     | <i><math>p = 0.198</math></i>           |
| Social loneliness scale (Gierveld Scale) | <i><b><math>p = 0.012</math></b></i>    |
| Mini Nutritional Assessment (MNA)        | <i><b><math>p = 0.002</math></b></i>    |
