# Supplementary material for: The Impact of the COVID-19 Emergency on Life Activities and Delivery of Healthcare Services in the Elderly Population
Source: MDPI journal article supplement (doi:10.3390/jcm10184089), 2021-09-10
Supplement: s1 [file s1]

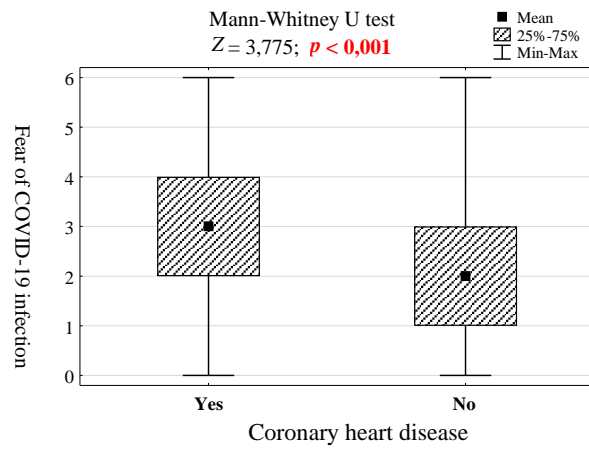

A

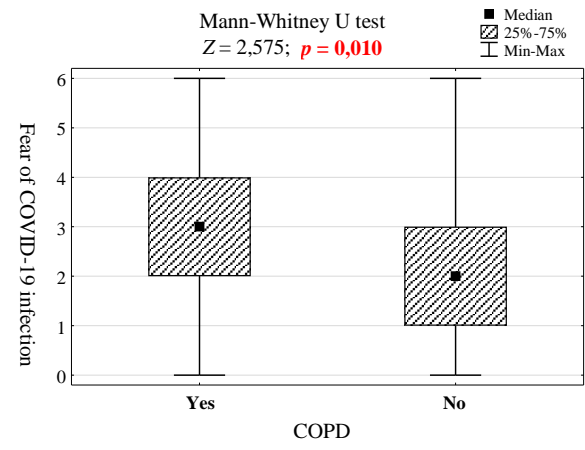

B

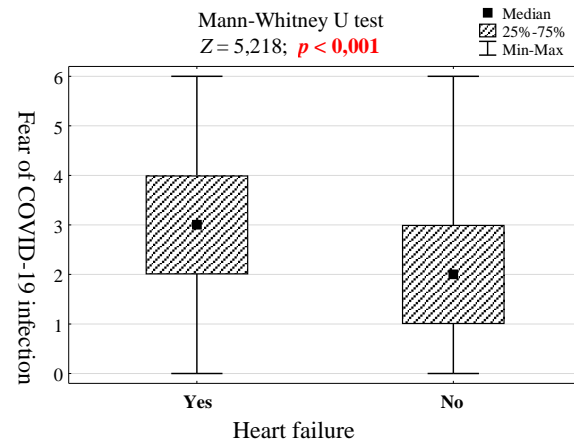

C

**Figure S1:** Responses to the question of the fear of COVID-19 infection in elderly patients who (A) suffer from coronary heart disease, (B) suffer from COPD, (C) suffer from heart failure and the results of independent non-parametric significance tests.
