# Supplementary material for: The Impact of the COVID-19 Emergency on Life Activities and Delivery of Healthcare Services in the Elderly Population
Source: MDPI journal article supplement (doi:10.3390/jcm10184089), 2021-09-10
Supplement: s1 [file s1]

**Table S1:** Responses to the questions regarding canceling planned hospitalizations due to the fear of COVID-19 infection in elderly patients and socio-demographic and clinical factors [in red =  $p < 0.005$  → significant correlation]

| Feature (variable)                                                                              | p value     |
|-------------------------------------------------------------------------------------------------|-------------|
| Gender                                                                                          | $p = 0.651$ |
| Age                                                                                             | $p = 0.544$ |
| Place of residence                                                                              | $p = 0.596$ |
| Household size                                                                                  | $p = 0.451$ |
| Education                                                                                       | $p = 0.484$ |
| Household income per person per month                                                           | $p = 0.145$ |
| Coronary Heart Disease                                                                          | $p < 0.001$ |
| Diabetes Mellitus                                                                               | $p = 0.085$ |
| Asthma                                                                                          | $p = 0.026$ |
| COPD                                                                                            | $p < 0.001$ |
| Heart failure                                                                                   | $p < 0.001$ |
| Kidney failure                                                                                  | $p = 0.057$ |
| Was vaccinated against influenza in 2019                                                        | $p < 0.001$ |
| Was vaccinated against influenza in 2020                                                        | $p = 0.008$ |
| Avoids vaccination because of possible complications                                            | $p = 0.546$ |
| Wants to be vaccinated against influenza but was unable due to lack of availability of vaccines | $p = 0.971$ |
| The GP doctor recommended vaccination against influenza and pneumococci                         | $p = 0.008$ |
| Knows about refund for seniors vaccinated against influenza and pneumococci                     | $p = 0.905$ |
| Number of drugs taken                                                                           | $p < 0.001$ |
| Cardiac drugs                                                                                   | $p < 0.001$ |
| Antihypertensive drugs                                                                          | $p = 0.766$ |
| Diuretics                                                                                       | $p = 0.053$ |
| Analgesics                                                                                      | $p = 0.052$ |
| Digestive ailments drugs                                                                        | $p = 0.378$ |
| Anticoagulants                                                                                  | $p = 0.135$ |
| Antidepressants                                                                                 | $p = 0.901$ |
| Nootropics                                                                                      | $p = 0.014$ |
| All drugs are prescribed by the same doctor                                                     | $p = 0.819$ |
| The number of different doctors that have prescribed medications?                               | $p = 0.012$ |
| Inform the GP about all new medications                                                         | $p = 0.112$ |
| Buy drugs and/or supplements without a prescription                                             | $p = 0.652$ |
| Analgesics                                                                                      | $p = 0.808$ |
| For heartburn                                                                                   | $p = 0.478$ |
| Herbal                                                                                          | $p = 0.653$ |
| Vitamins (C, B, D)                                                                              | $p = 0.825$ |
| Other                                                                                           | $p = 0.585$ |
| Physician diagnosed gastro-oesophageal reflux disease                                           | $p = 0.240$ |
| Activities of Daily Living (ADL)                                                                | $p = 0.298$ |
| The Lawton Instrumental Activities of Daily Living (IADL)                                       | $p < 0.001$ |

|                                          |             |
|------------------------------------------|-------------|
| Abbreviated Mental Test Score (AMTS)     | $p = 0.671$ |
| Geriatric depression scale (GDS-15)      | $p = 0.056$ |
| Gastric Anxiety Scale (GAS-10)           | $p = 0.002$ |
| Lubben Social Network Scale (LSNS-6)     | $p = 0.004$ |
| Social loneliness scale (Gierveld Scale) | $p = 0.913$ |
| Mini Nutritional Assessment (MNA)        | $p < 0.001$ |
